# Supplementary material
Source: Royal Society of Chemistry journal article supplement (doi:10.1039/d6nr01616b)
Supplement: d6nr01616b1.pdf [file d6nr01616b1.pdf]

# High-throughput screening of two-dimensional ferromagnetic materials with high Curie temperatures

Shuo Li<sup>a</sup>, Chao Jia<sup>a</sup>, Haidi Wang<sup>\*b</sup>, Xingxing Li<sup>\*c</sup>, and Qunxiang Li<sup>\*c</sup>

<sup>a</sup>Key Laboratory of Precision and Intelligent Chemistry, University of Science and Technology of China, Hefei, Anhui 230026, China

<sup>\*b</sup>School of Physics, Hefei University of Technology, Hefei, Anhui 230009

<sup>\*c</sup>School of Electronic Science and Applied Physics, Hefei University of Technology, Hefei, Anhui 230009

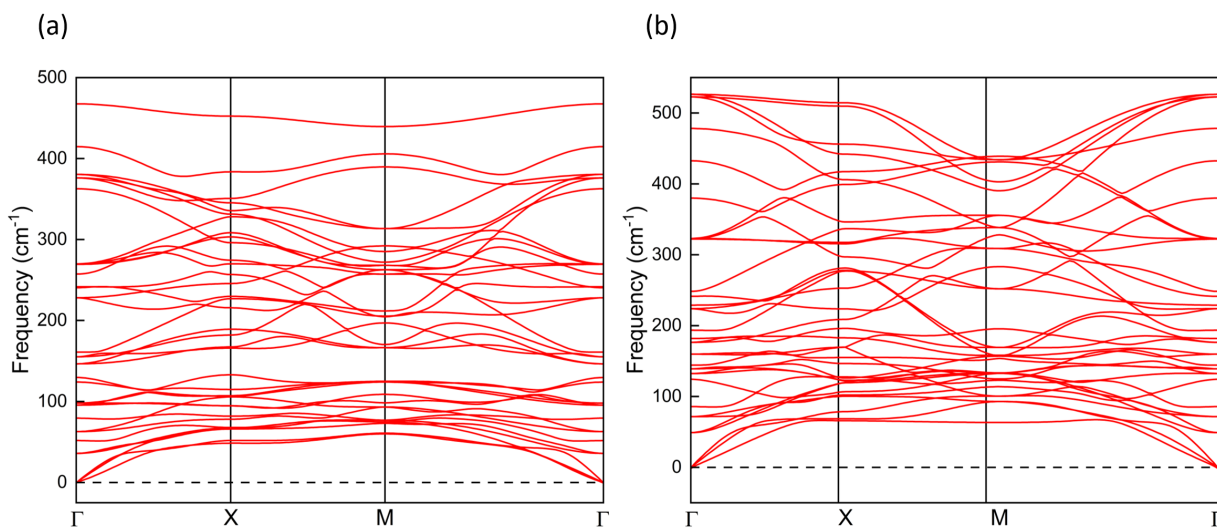

**Fig. S1.** Phonon spectra of (a)  $\text{Ba}_3\text{Mn}_2\text{I}_2\text{O}_5$  and (b)  $\text{Sr}_3\text{Mn}_2\text{Cl}_2\text{O}_5$ , calculated with  $2 \times 2 \times 1$  supercells.

---

Further author information:

Haidi Wang: E-mail: haidi@hfut.edu.cn

Xingxing Li: E-mail: lixx@ustc.edu.cn

Qunxiang Li: E-mail: liqun@ustc.edu.cn

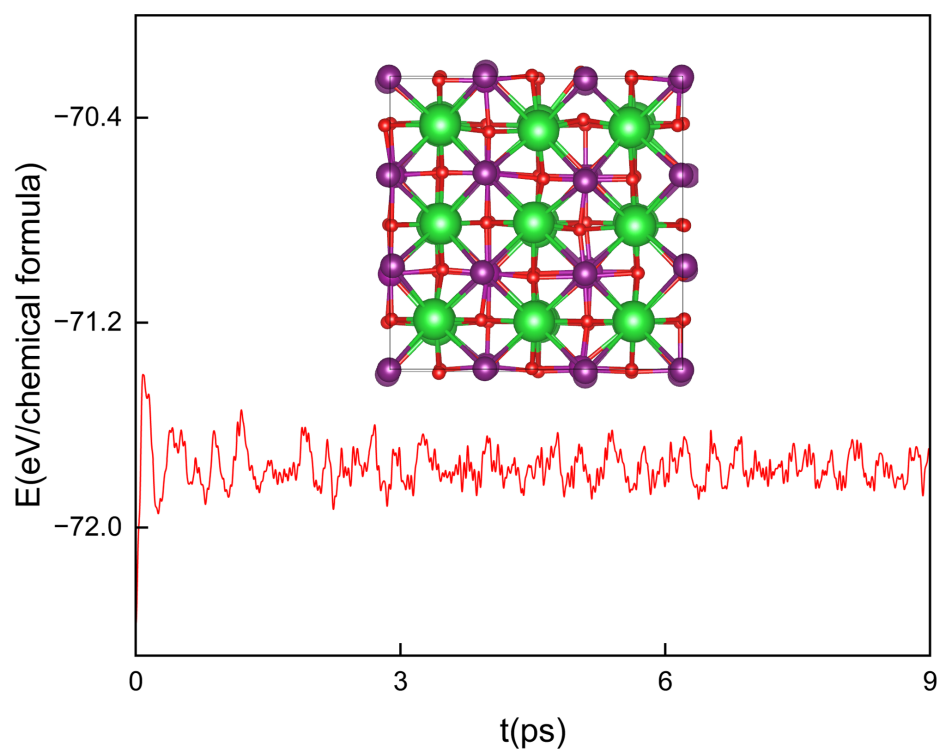

**Fig. S2.** Total potential energy fluctuation of  $\text{Ba}_3\text{Mn}_2\text{I}_2\text{O}_5$  nanosheets during ab initio molecular dynamics at 400 K using a  $2 \times 2 \times 1$  supercell. The inset shows the snapshot at the end of the simulation.

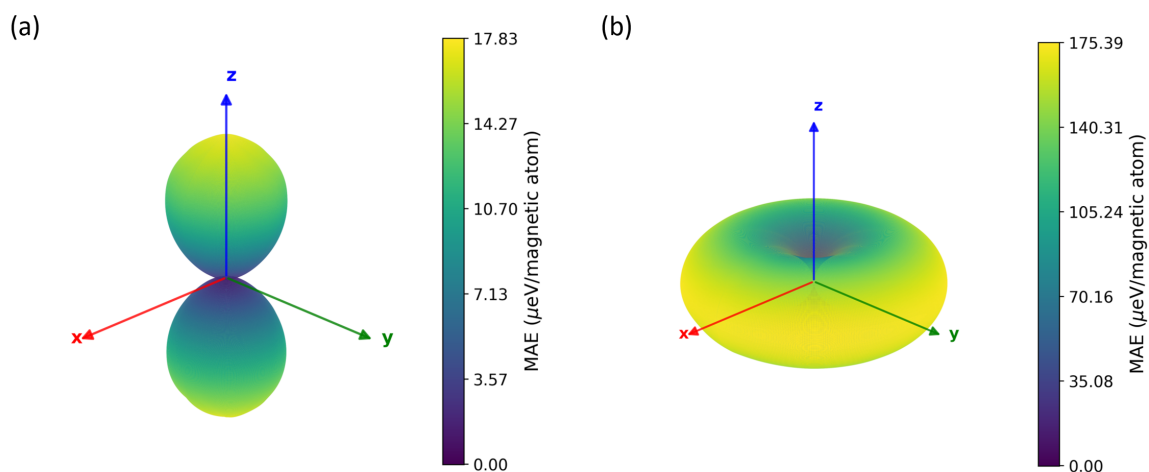

**Fig. S3.** Magnetocrystalline anisotropy energy (MAE,  $\mu\text{eV}/\text{magnetic atom}$ ) of (a)  $\text{Ba}_3\text{Mn}_2\text{I}_2\text{O}_5$  and (b)  $\text{Sr}_3\text{Mn}_2\text{Cl}_2\text{O}_5$ .

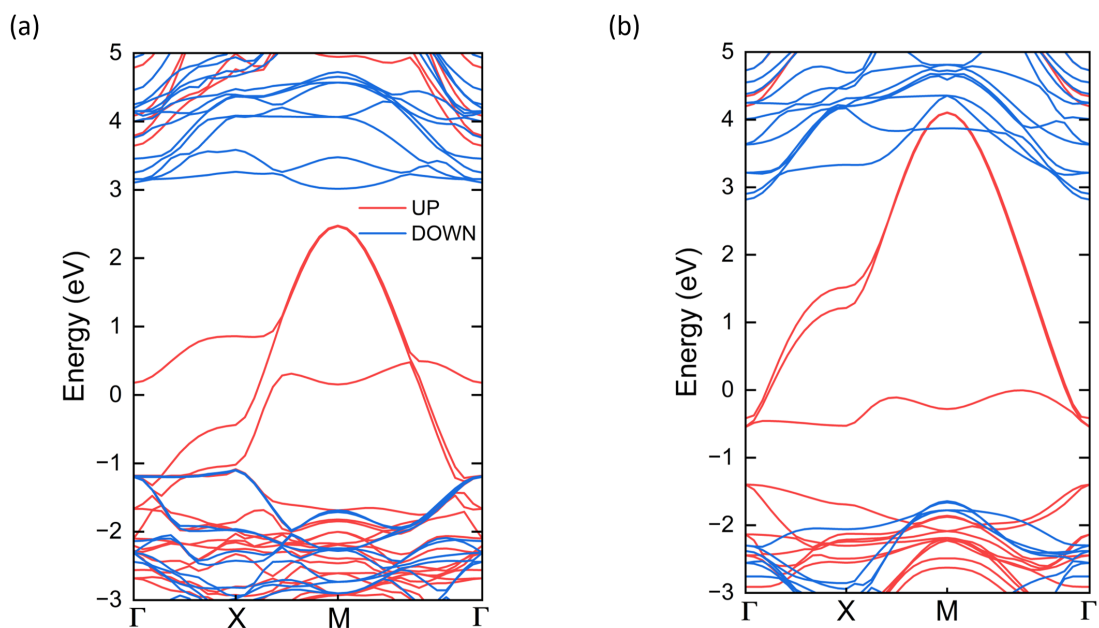

**Fig. S4.** Band structure of (a)  $\text{Ba}_3\text{Mn}_2\text{I}_2\text{O}_5$  and (b)  $\text{Sr}_3\text{Mn}_2\text{Cl}_2\text{O}_5$  based on the HSE06 functional.

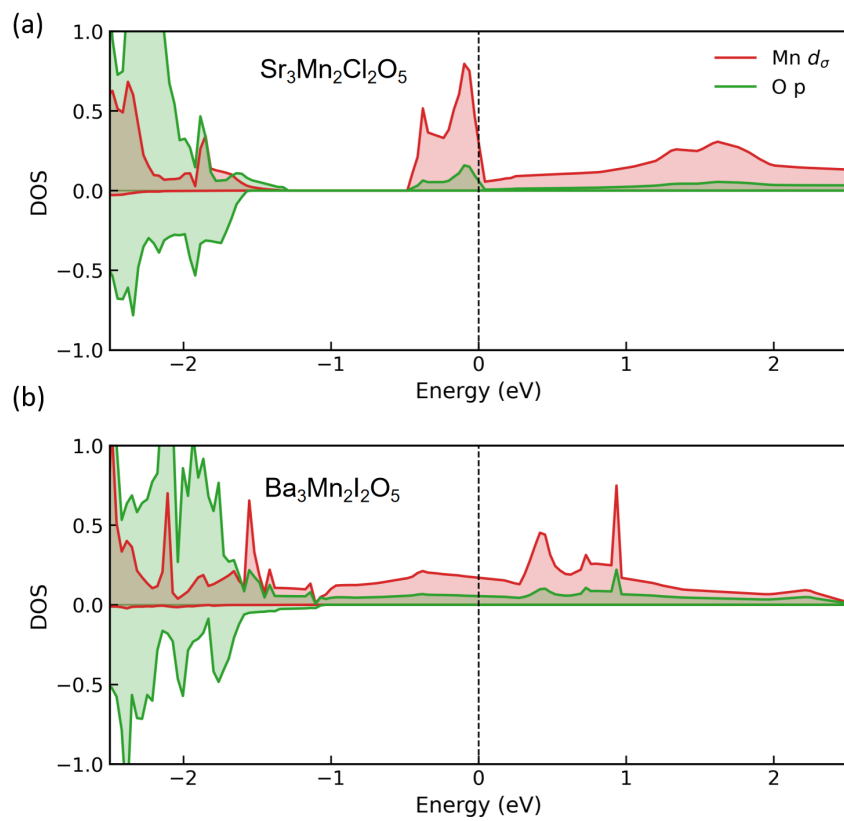

**Fig. S5.** Density of states of (a)  $\text{Sr}_3\text{Mn}_2\text{Cl}_2\text{O}_5$  and (b)  $\text{Ba}_3\text{Mn}_2\text{I}_2\text{O}_5$  calculated using the HSE06 functional.

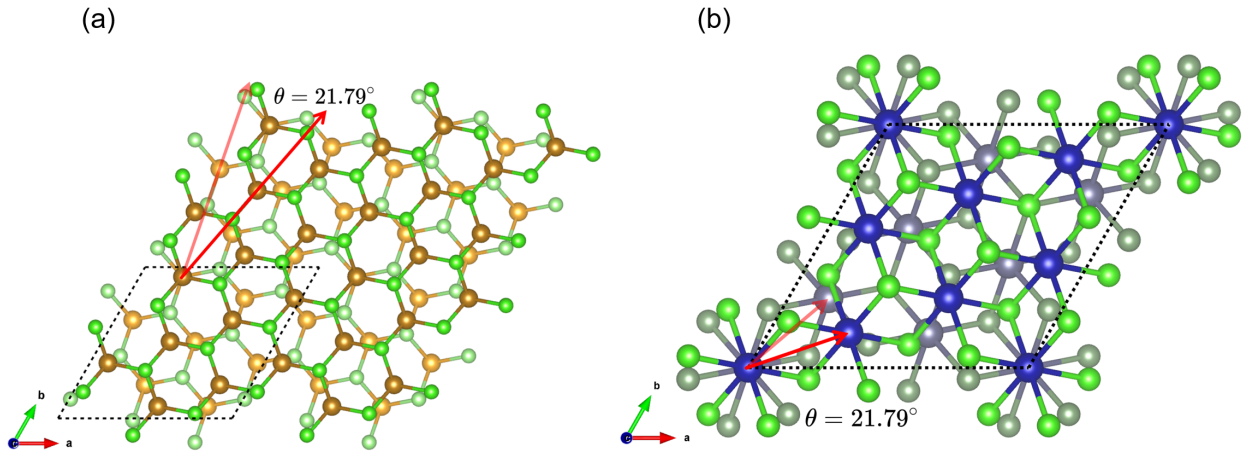

**Fig. S6.** The crystal structures of bilayer (a) H-FeCl<sub>2</sub> and (b) CoCl<sub>2</sub>, respectively, rotated by  $\theta = 21.79^\circ$ .

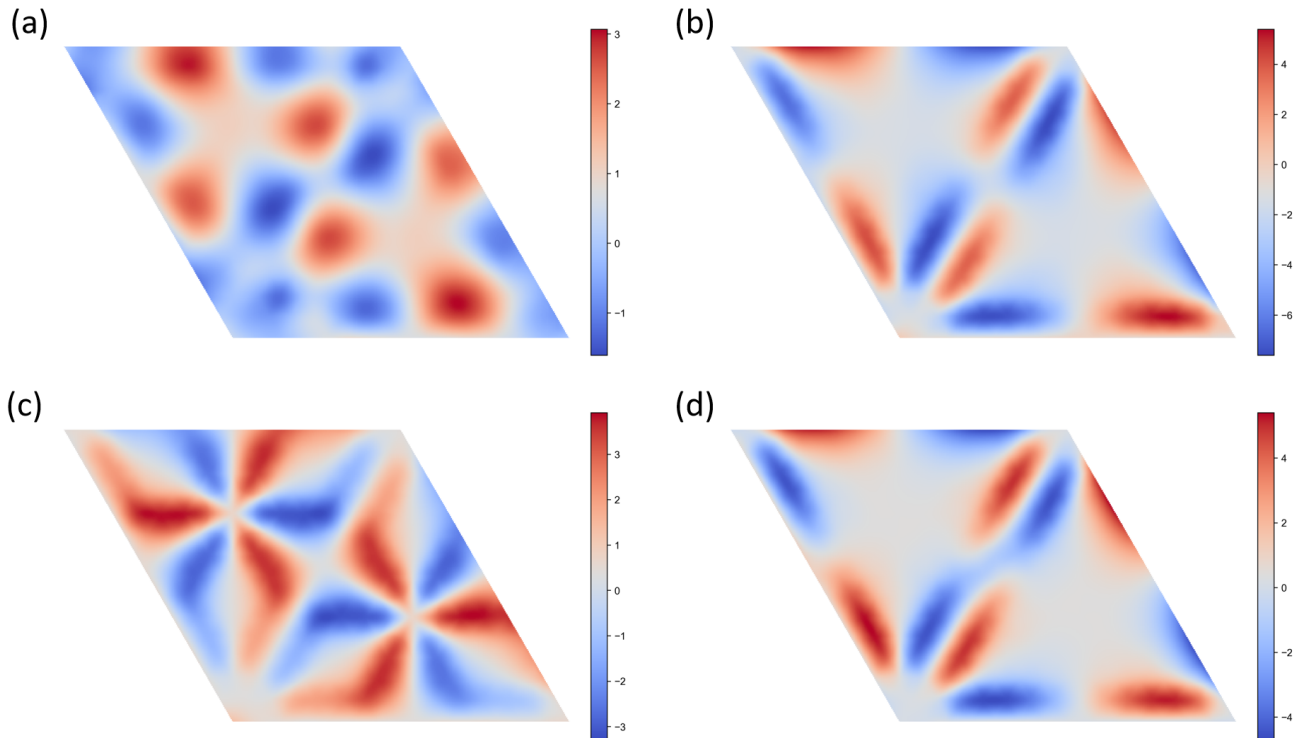

**Fig. S7.** The spin-splitting energy projections of the (a) HVB and (b) LCB, respectively, for H-FeCl<sub>2</sub>, while (c) and (d) present the corresponding results for CoCl<sub>2</sub>. The red (blue) color blocks indicate regions where  $E_{\text{spin-up}} > E_{\text{spin-down}}$  ( $E_{\text{spin-up}} < E_{\text{spin-down}}$ ).

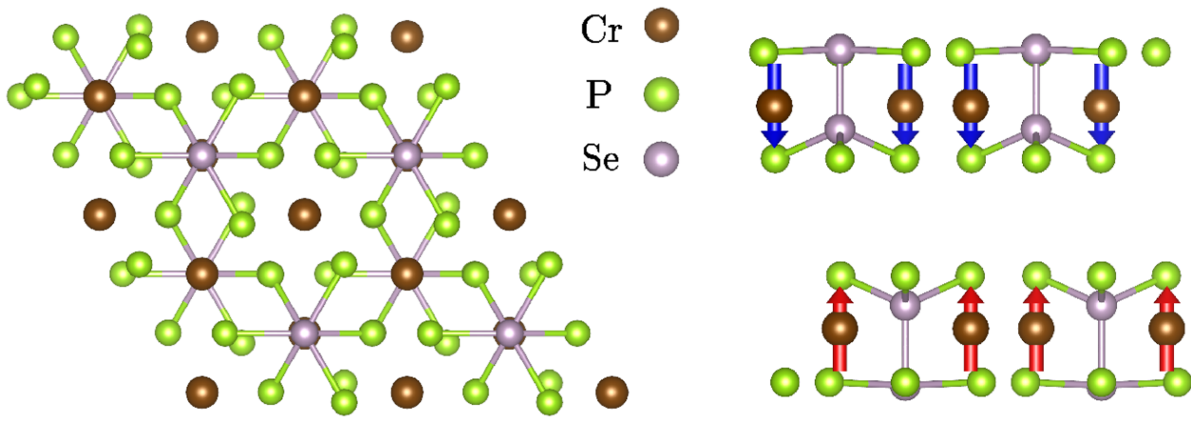

**Fig. S8.** Bilayer structure of CrPSe<sub>3</sub>.

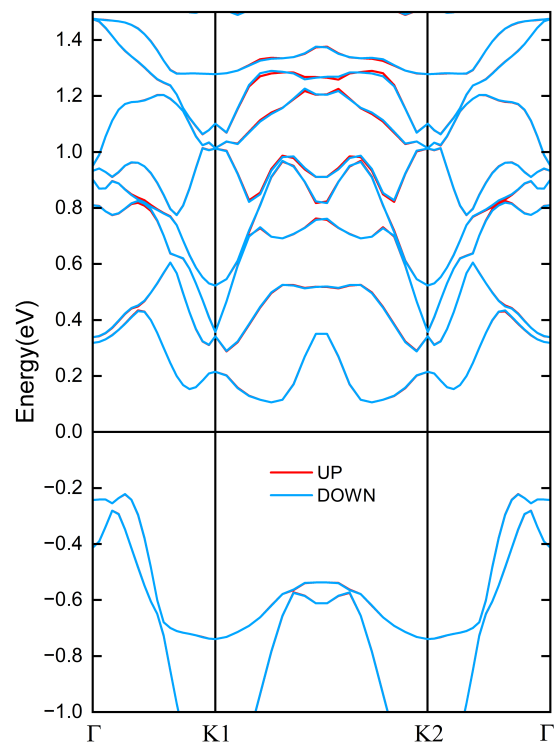

**Fig. S9.** Band structure of CrPSe<sub>3</sub>. The path between  $K1(\frac{1}{3}, \frac{1}{3})$  and  $K2(\frac{1}{3}, -\frac{2}{3})$  is not a high-symmetry path.

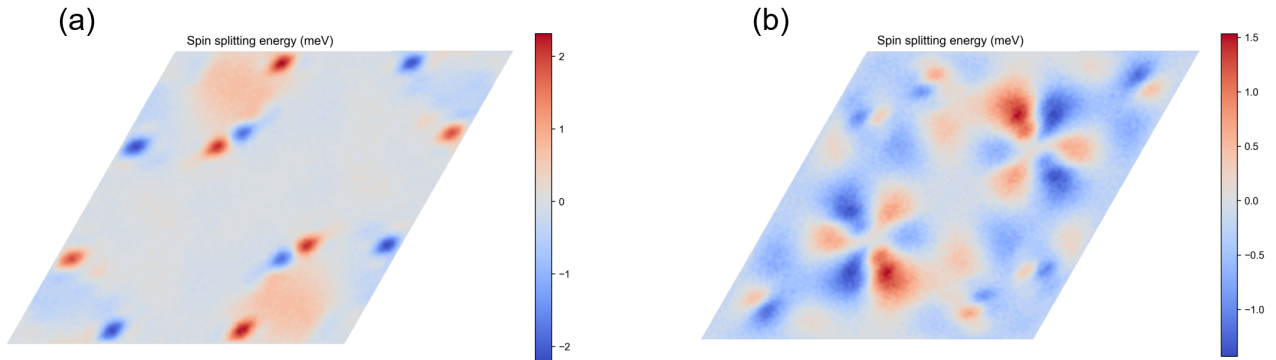

**Fig. S10.** Spin-splitting energy projections of (a) HVB and (b) LCB, respectively, for CrPSe<sub>3</sub>, where the red (blue) color block indicates  $E_{\text{spin-up}} > E_{\text{spin-down}}$  ( $E_{\text{spin-up}} < E_{\text{spin-down}}$ ).

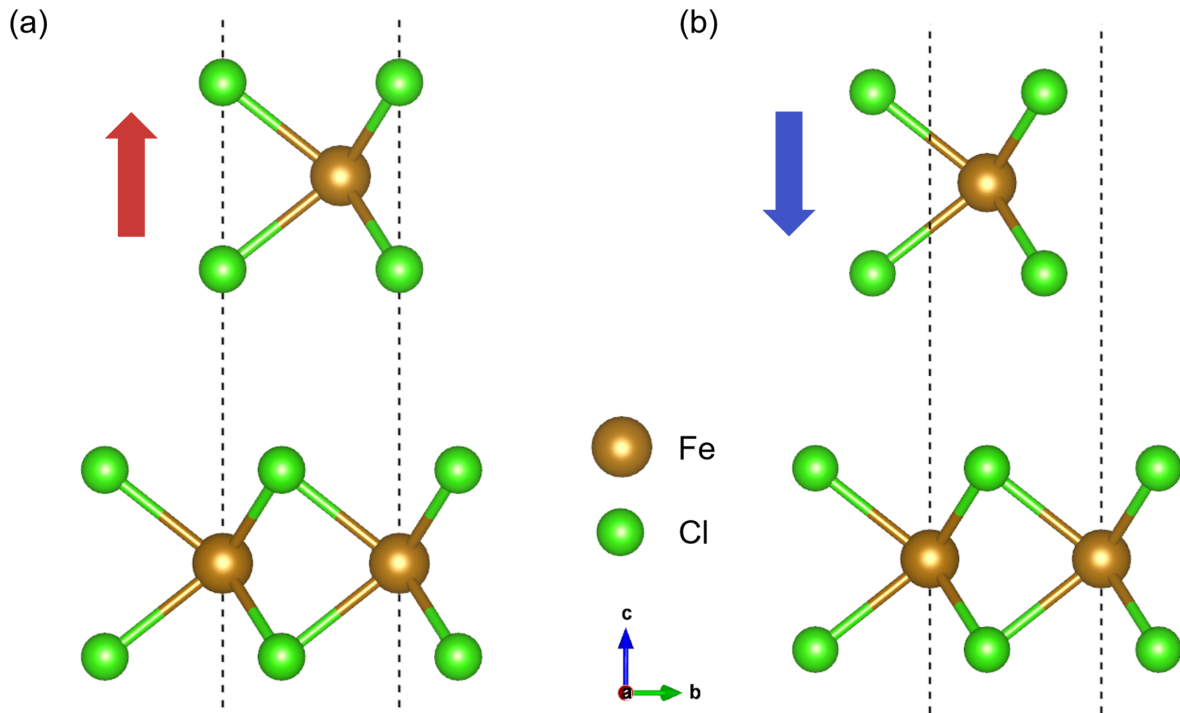

**Fig. S11.** (a) H-FeCl<sub>2</sub>'s  $(\frac{1}{3}, -\frac{1}{3})$  polarization point. (b) H-FeCl<sub>2</sub>'s  $(\frac{2}{3}, -\frac{2}{3})$  polarization point.

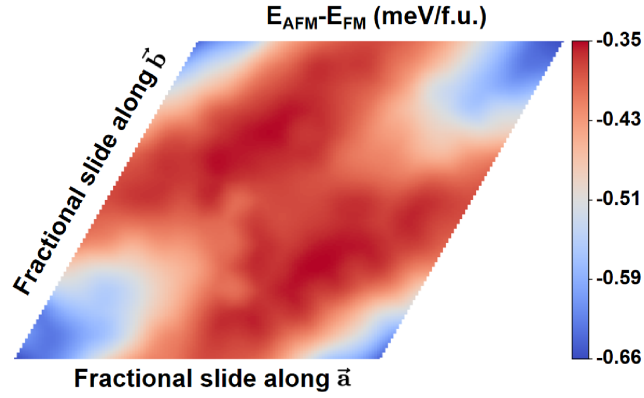

**Fig. S12.** 2D map of the interlayer exchange energy as a function of fractional lateral slide. The abscissa and ordinate stand for the fractional shift of the H-FeCl<sub>2</sub> layer in the  $\vec{a}$  and  $\vec{b}$  directions of the superlattice, respectively.

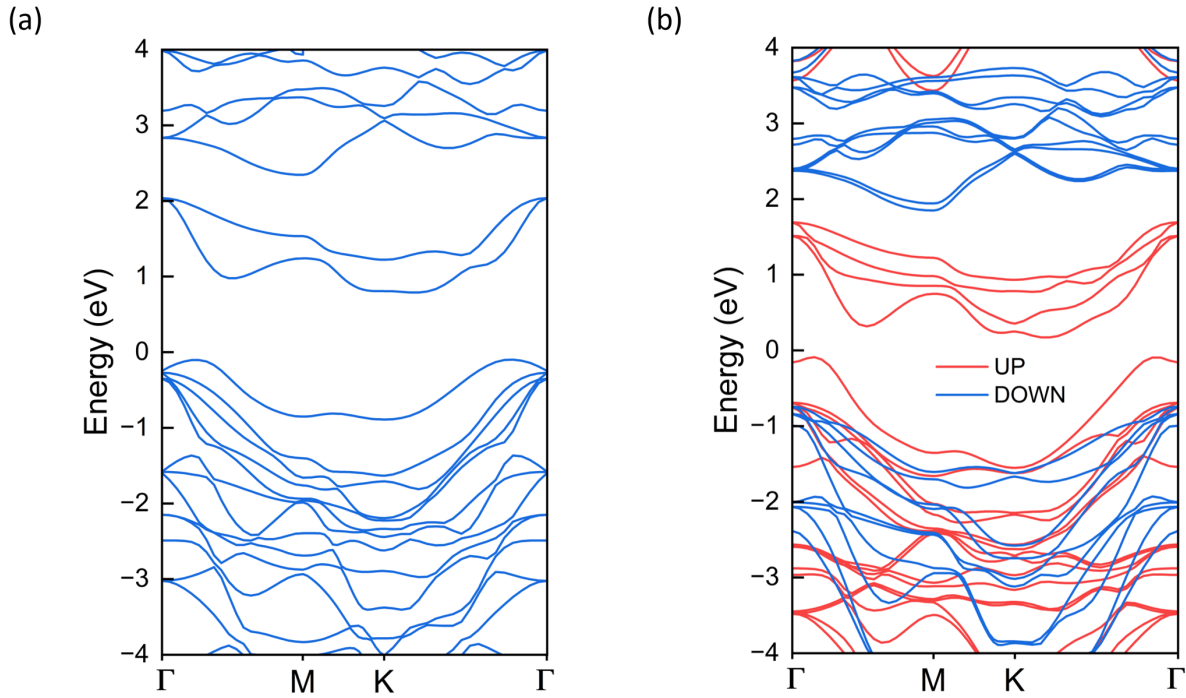

**Fig. S13.** The band structures of (a) AFM and (b) FM in the ground state of CrSeI during sliding process, respectively.

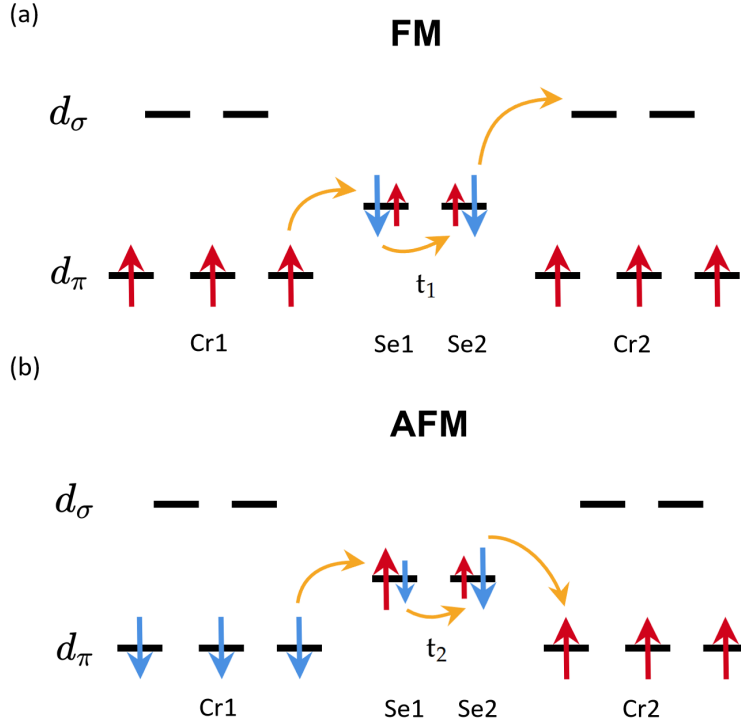

**Fig. S14.** (a) and (b) Interlayer hopping pathways of T-CeSeI based on super-superexchange interactions for FM and AFM couplings, respectively, where  $t_1$  favors FM order, while  $t_2$  favors AFM order.

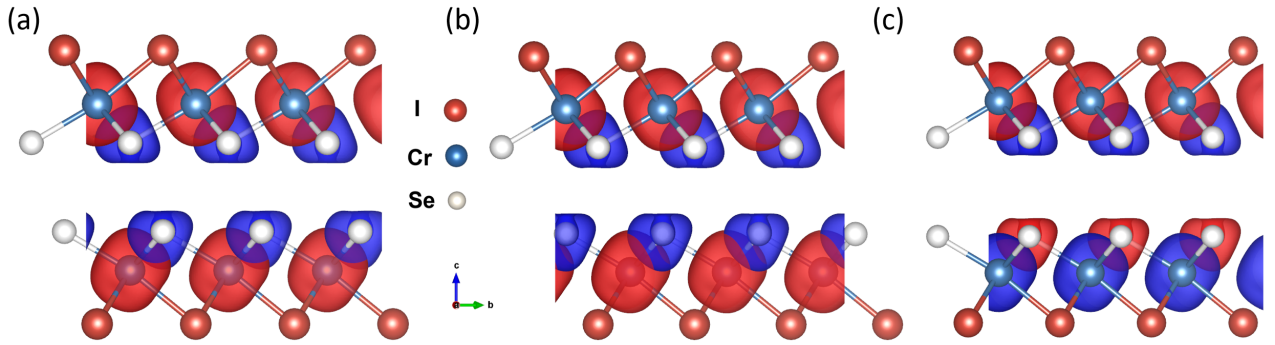

**Fig. S15.** (a) and (b) are the total spin densities for FM State-I and FM State-II, respectively. (c) is the total spin density for the AFM State-III. We define the bilayer T-CrSeI with interlayer mirror symmetry and an AFM ground state as State-III. The isovalue is set as  $0.005 \text{ eV}/\text{\AA}^3$ .

**Table. S1.** Formula, space group symmetry, exchange interaction constants ( $J_1$ ,  $J_2$ ,  $J_3$  in meV), magnetocrystalline anisotropy energy (MAE,  $\mu\text{eV}/\text{magnetic atom}$ ), easy or hard axis direction and lattice constant for the 2D magnetic materials.

|    | Formula                                                        | Symmetry       | $J_1$ (meV) | $J_2$ (meV) | $J_3$ (meV) | MAE( $\mu\text{eV}/\text{atom}$ ) | easy/hard axis | a( $\text{\AA}$ ) | b( $\text{\AA}$ ) |
|----|----------------------------------------------------------------|----------------|-------------|-------------|-------------|-----------------------------------|----------------|-------------------|-------------------|
| 1  | FeCl <sub>2</sub>                                              | P $\bar{6}$ m2 | 54.52       | 5.33        | -5.12       | 190.42                            | [001](E)       | 3.365             | 3.365             |
| 2  | Al <sub>2</sub> CoSe <sub>4</sub>                              | P $\bar{3}$ m1 | 8.86        | 3.87        | -7.31       | 35.56                             | [001](E)       | 3.773             | 3.773             |
| 3  | VBr <sub>3</sub>                                               | P $\bar{3}$ 1m | 0.99        | 16.41       | 1.37        | 307.78                            | [001](H)       | 6.599             | 6.599             |
| 4  | VCl <sub>3</sub>                                               | P $\bar{3}$ 1m | 0.004       | 11.97       | -0.0003     | 291.04                            | [001](E)       | 5.960             | 5.960             |
| 5  | CrSeI                                                          | P3m1           | 24.16       | 0.95        | -1.06       | 40.93                             | [001](H)       | 3.774             | 3.775             |
| 6  | Ca <sub>3</sub> Mn <sub>2</sub> I <sub>2</sub> O <sub>5</sub>  | P4/mmm         | 11.74       | 29.84       | 22.92       | 47.25                             | [001](H)       | 3.942             | 3.942             |
| 7  | CrPSe <sub>3</sub>                                             | P31m           | 19.52       | 6.27        | -2.23       | 47.96                             | [001](H)       | 6.397             | 6.398             |
| 8  | CrSeCl                                                         | Pmmm           | 5.31        | 15.15       | 10.92       | 119.12                            | [001](H)       | 5.043             | 3.536             |
| 9  | CrSeI                                                          | Pmmm           | 13.53       | 14.56       | 14.93       | 404.24                            | [100](H)       | 5.005             | 3.796             |
| 10 | Sr <sub>3</sub> Mn <sub>2</sub> Cl <sub>2</sub> O <sub>5</sub> | P4/mmm         | 17.03       | 23.78       | 12.57       | 175.39                            | [001](E)       | 3.946             | 3.946             |
| 11 | CrSCl                                                          | Pmmm           | 4.34        | 13.86       | 13.63       | 28.20                             | [001](H)       | 4.755             | 3.453             |
| 12 | MnBrO                                                          | Pmmm           | 18.73       | 32.55       | 55.01       | 405.94                            | [100](E)       | 3.847             | 3.431             |
| 13 | Mn <sub>3</sub> CrO <sub>8</sub>                               | P $\bar{3}$ m1 | 14.41       | 1.86        | 3.73        | 90.42                             | [001](E)       | 5.840             | 5.850             |
| 14 | MnO <sub>2</sub>                                               | P $\bar{3}$ m1 | 12.64       | 0.48        | -1.33       | 325.84                            | [001](E)       | 2.894             | 2.894             |
| 15 | Mn <sub>2</sub> CrO <sub>6</sub>                               | P $\bar{3}$ 1m | 12.46       | 13.59       | -0.47       | 114.46                            | [001](H)       | 5.060             | 5.060             |
| 16 | CrSF                                                           | Pmmm           | 4.81        | 12.64       | -1.21       | 24.64                             | [001](E)       | 4.765             | 3.234             |
| 17 | MnI <sub>3</sub>                                               | P $\bar{3}$ 1m | 14.71       | 2.24        | -1.44       | 18954.02                          | [001](H)       | 7.099             | 7.099             |
| 18 | CrSI                                                           | Pmmm           | 12.00       | 11.36       | 16.51       | 573.75                            | [100](H)       | 4.723             | 3.707             |
| 19 | Sr <sub>2</sub> MnClO <sub>3</sub>                             | P4/nmm         | 3.81        | 7.18        | 1.06        | 444.63                            | [001](E)       | 3.899             | 3.899             |
| 20 | Sr <sub>2</sub> MnIO <sub>3</sub>                              | P4/nmm         | 6.62        | 13.25       | 2.71        | 343.51                            | [1-10](H)      | 3.967             | 3.967             |
| 21 | Al <sub>2</sub> CoS <sub>4</sub>                               | P $\bar{3}$ m1 | 7.68        | 4.95        | 5.46        | 48.24                             | [001](E)       | 3.601             | 3.601             |
| 22 | Al <sub>2</sub> CoS <sub>4</sub>                               | P $\bar{3}$ m1 | 4.98        | 1.57        | 6.81        | 7.67                              | [001](E)       | 3.578             | 3.578             |
| 23 | CrTeCl                                                         | P3m1           | 14.26       | 1.76        | -4.71       | 1351.52                           | [001](H)       | 3.700             | 3.698             |
| 24 | CrAsS <sub>3</sub>                                             | P31m           | 11.98       | 2.33        | 1.17        | 46.56                             | [001](E)       | 6.155             | 6.155             |
| 25 | CrHS <sub>2</sub>                                              | P3m1           | 12.15       | 0.72        | -1.45       | 4.99                              | [001](H)       | 3.573             | 3.573             |
| 26 | Ca <sub>2</sub> MnIO <sub>3</sub>                              | P4/nmm         | 2.71        | 5.41        | 0.59        | 240.65                            | [001](E)       | 3.873             | 3.873             |
| 27 | CrPS <sub>3</sub>                                              | P31m           | 11.95       | 1.15        | 1.76        | 54.78                             | [001](E)       | 6.064             | 6.063             |
| 28 | CoCl <sub>2</sub>                                              | P $\bar{3}$ m1 | 2.67        | 1.46        | 0.96        | 480.38                            | [001](H)       | 3.537             | 3.537             |
| 29 | VOF                                                            | P $\bar{3}$ m1 | 6.18        | 3.06        | -0.08       | 79.18                             | [001](H)       | 3.310             | 3.310             |
| 30 | CrAuP <sub>2</sub> S <sub>6</sub>                              | P312           | 5.78        | 5.77        | 5.77        | 135.11                            | [001](H)       | 6.055             | 6.055             |
| 31 | Sr <sub>2</sub> MnClO <sub>3</sub>                             | P4/nmm         | 3.30        | 6.59        | 0.92        | 419.87                            | [001](E)       | 3.899             | 3.899             |
| 32 | MnTeI                                                          | Pmmm           | -3.46       | 7.15        | 29.92       | 6527.09                           | [001](H)       | 5.562             | 3.893             |
| 33 | CrAgP <sub>2</sub> S <sub>6</sub>                              | P312           | 5.19        | 5.22        | 5.19        | 98.93                             | [001](H)       | 6.056             | 6.056             |
| 34 | CrOF                                                           | Pmmm           | 4.13        | 3.37        | 7.59        | 136.60                            | [100](H)       | 3.009             | 3.911             |
|    | Ba <sub>3</sub> Mn <sub>2</sub> I <sub>2</sub> O <sub>5</sub>  | P4/mmm         | 131.40      | 43.05       | 8.07        | 17.83                             | [001](H)       | 4.160             | 4.160             |

**Table. S2.** Magnetic parameters calculated in relevant literature: Formula, Software used for calculation, exchange energy per magnetic atom ( $E_{\text{ex}}$ , meV), exchange interaction constants ( $J_1$ ,  $J_2$ ,  $J_3$  in meV), magnetocrystalline anisotropy energy (MAE,  $\mu\text{eV}/\text{magnetic atom}$ ), easy or hard axis direction, Curie temperature, reference.

|    | Formula           | software | $E_{\text{ex}}$ (meV) | $J_1$ (meV) | $J_2$ (meV) | $J_3$ (meV) | MAE( $\mu\text{eV}/\text{atom}$ ) | easy/hard axis | $T_c$ | Ref       |
|----|-------------------|----------|-----------------------|-------------|-------------|-------------|-----------------------------------|----------------|-------|-----------|
| 1  | FeCl <sub>2</sub> | VASP     | 214.73                | 54.52       | 5.33        | -5.12       | 190.42                            | [001](E)       | 701   | this work |
| 1  | FeCl <sub>2</sub> | GPAW     | 242.24                | -           | -           | -           | -                                 | -              | 202   | [1]       |
| 1  | FeCl <sub>2</sub> | VASP     | 250                   | -           | -           | -           | 420                               | -              | -     | [2]       |
| 1  | FeCl <sub>2</sub> | QE       | 123.44                | 3.86        | -           | -           | 460                               | [001](E)       | -     | [3]       |
| 3  | VBr <sub>3</sub>  | VASP     | 126.73                | 0.99        | 16.41       | 1.37        | 307.78                            | [001](H)       | 253   | this work |
| 3  | VBr <sub>3</sub>  | WIEN2k   | -                     | 5.2         | -           | -           | 1900                              | [001](H)       | 20    | [4]       |
| 4  | VCl <sub>3</sub>  | VASP     | 108.01                | 0.004       | 11.97       | -0.0003     | 291.04                            | [001](E)       | 157   | this work |
| 4  | VCl <sub>3</sub>  | GPAW     | -                     | -           | -           | -           | -                                 | -              | 134   | [5]       |
| 5  | CrSeI             | VASP     | 95.49                 | 24.16       | 0.95        | -1.06       | 40.93                             | [001](H)       | 296   | this work |
| 5  | CrSeI             | VASP     | -                     | 26.24       | 0.82        | -2.04       | -                                 | -              | 334   | [6]       |
| 5  | CrSeI             | VASP     | -                     | 25.40       | 0.81        | -3.15       | -                                 | -              | -     | [7]       |
| 8  | CrSeCl            | VASP     | 61.99                 | 5.31        | 15.15       | 10.92       | 119.12                            | [001](H)       | 204   | this work |
| 8  | CrSeCl            | GPAW     | -                     | 7.05        | 5.81        | -           | 38                                | [001](H)       | 130   | [1]       |
| 8  | CrSeCl            | VASP     | -                     | 12.3        | 13.6        | -4.6        | 179                               | [100](E)       | 110   | [8]       |
| 8  | CrSeCl            | VASP     | -                     | 5.94        | 15.3        | 2.52        | 10                                | [010](E)       | 118   | [9]       |
| 9  | CrSeI             | VASP     | 60.47                 | 13.53       | 14.56       | 14.93       | 404.24                            | [100](H)       | 257   | this work |
| 9  | CrSeI             | VASP     | -                     | 13.6        | 16.4        | 1.4         | 921                               | [001](E)       | 192   | [8]       |
| 9  | CrSeI             | VASP     | -                     | 14.04       | 16.515      | 5.31        | 20                                | [010](E)       | 164   | [9]       |
| 11 | CrSCl             | VASP     | 56.59                 | 4.34        | 13.86       | 13.63       | 28.20                             | [001](H)       | 208   | this work |
| 11 | CrSCl             | GPAW     | -                     | 6.52        | 3.99        | -           | 26                                | [001](H)       | 130   | [1]       |
| 11 | CrSCl             | VASP     | -                     | 11.7        | 13.6        | 3.6         | 7                                 | [010](H)       | 161   | [8]       |
| 11 | CrSCl             | VASP     | -                     | 4.05        | 13.41       | 5.67        | 20                                | [001](H)       | 108   | [9]       |
| 11 | CrSCl             | VASP     | 62                    | 14.895      | 30.87       | -           | 56                                | [010](H)       | 150   | [10]      |
| 14 | MnO <sub>2</sub>  | VASP     | 51.97                 | 12.64       | 0.48        | -1.33       | 325.84                            | [001](E)       | 127   | this work |
| 14 | MnO <sub>2</sub>  | GPAW     | 30.15                 | -           | -           | -           | -                                 | -              | 63    | [1]       |
| 14 | MnO <sub>2</sub>  | GPAW     | -                     | -           | -           | -           | -                                 | -              | 17    | [5]       |
| 14 | MnO <sub>2</sub>  | VASP     | 62                    | 13.76       | -           | -           | -                                 | -              | 140   | [11]      |
| 17 | MnI <sub>3</sub>  | VASP     | 50.00                 | 14.71       | 2.24        | -1.44       | 18954.02                          | [001](H)       | 166   | this work |
| 17 | MnI <sub>3</sub>  | VASP     | -                     | -           | -           | -           | 8681.4                            | [001](H)       | 253   | [12]      |
| 18 | CrSI              | VASP     | 49.04                 | 12.00       | 11.36       | 16.51       | 573.75                            | [100](H)       | 244   | this work |
| 18 | CrSI              | GPAW     | -                     | 5.71        | 4.85        | -           | 223                               | [100](H)       | 140   | [1]       |
| 18 | CrSI              | VASP     | -                     | 13.5        | 12.9        | 7.2         | 1022                              | [010](H)       | 203   | [8]       |
| 18 | CrSI              | VASP     | -                     | 13.815      | 11.205      | 7.605       | 60                                | [010](E)       | 146   | [9]       |
| 18 | CrSI              | VASP     | 68                    | 34.155      | 15.255      | -           | 913                               | [010](H)       | 170   | [10]      |
| 28 | CoCl <sub>2</sub> | VASP     | 33.06                 | 2.67        | 1.46        | 0.96        | 480.38                            | [001](H)       | 86    | this work |
| 28 | CoCl <sub>2</sub> | GPAW     | 412.29                | -           | -           | -           | -                                 | -              | 55    | [1]       |
| 28 | CoCl <sub>2</sub> | GPAW     | -                     | -           | -           | -           | -                                 | -              | 25    | [5]       |
| 28 | CoCl <sub>2</sub> | QE       | 53.05                 | -           | -           | -           | -                                 | -              | 85    | [13]      |
| 34 | CrOF              | VASP     | 14.54                 | 4.13        | 3.37        | 7.59        | 136.60                            | [100](H)       | 82    | this work |
| 34 | CrOF              | VASP     | -                     | 4.0         | 3.6         | 7.7         | 32                                | [001](E)       | 82    | [8]       |
| 34 | CrOF              | VASP     | -                     | 2.86        | 4.92        | 9.04        | -                                 | -              | 150   | [14]      |

Note: In Table S2, we compare our calculated results with those reported in previous studies. Some discrepancies are observed, which mainly arise from the insufficient accuracy in describing exchange interactions. If the Curie temperature is estimated only from the total exchange energy or by considering solely the nearest-neighbor exchange interaction  $J_1$ , the calculated values may exhibit significant deviations. As shown in our results, the next-nearest-neighbor  $J_2$  and third-nearest-neighbor  $J_3$  interactions also play non-negligible roles in determining the magnetic properties of the system and therefore must be taken into account for a more reliable estimation of the Curie temperature. The significant discrepancy between our calculated Curie temperature of VBr<sub>3</sub> and those reported in other works can be attributed to the completeness of the spin Hamiltonian (e.g., whether long-range exchange interactions are included) and the differences in the adopted lattice parameters.

**Table. S3.** Material type classified based on the density of states calculated with the HSE06 functional for the 34 two-dimensional magnetic materials: the spin-flip gap in conduction band ( $\Delta_1$ , eV), the spin-flip gap in valence band ( $\Delta_2$ , eV), total band gap( $\Delta_3$ , eV), spin up band gap( $\Delta_4$ , eV), spin down band gap( $\Delta_5$ , eV).

|    | Formula                                                        | Type | $\Delta_1$ (eV) | $\Delta_2$ (eV) | $\Delta_3$ (eV) | $\Delta_4$ (eV) | $\Delta_5$ (eV) |
|----|----------------------------------------------------------------|------|-----------------|-----------------|-----------------|-----------------|-----------------|
| 1  | FeCl <sub>2</sub>                                              | HSC  | 2.17            | 0.92            | 2.57            | 5.66            | 2.57            |
| 2  | Al <sub>2</sub> CoSe <sub>4</sub>                              | BMS  | 0.11            | 0.66            | 1.46            | 1.57            | 2.13            |
| 3  | VBr <sub>3</sub>                                               | HSC  | 1.21            | 0.61            | 2.03            | 2.03            | 3.85            |
| 4  | VCl <sub>3</sub>                                               | HSC  | 1.06            | 0.98            | 2.43            | 2.43            | 4.47            |
| 5  | CrSeI                                                          | HSC  | 1.34            | 0.13            | 1.74            | 1.74            | 3.21            |
| 6  | Ca <sub>3</sub> Mn <sub>2</sub> I <sub>2</sub> O <sub>5</sub>  | HMF  | -               | -               | -               | -               | 3.77            |
| 7  | CrPSe <sub>3</sub>                                             | HSC  | 0.33            | 0.03            | 0.67            | 0.67            | 1.03            |
| 8  | CrSeCl                                                         | BMS  | 1.86            | 0.13            | 0.87            | 0.99            | 2.73            |
| 9  | CrSeI                                                          | HSC  | 1.85            | 0.16            | 0.79            | 0.79            | 2.80            |
| 10 | Sr <sub>3</sub> Mn <sub>2</sub> Cl <sub>2</sub> O <sub>5</sub> | HMF  | -               | -               | -               | -               | 4.38            |
| 11 | CrSCl                                                          | HSC  | 1.36            | 0.19            | 1.90            | 1.90            | 3.45            |
| 12 | MnBrO                                                          | HMF  | -               | -               | -               | -               | 4.01            |
| 13 | Mn <sub>3</sub> CrO <sub>8</sub>                               | HSC  | 1.50            | 0.44            | 1.94            | 1.94            | 3.88            |
| 14 | MnO <sub>2</sub>                                               | HMF  | -               | -               | -               | -               | 4.18            |
| 15 | Mn <sub>2</sub> CrO <sub>6</sub>                               | HSC  | 1.44            | 0.54            | 1.91            | 1.91            | 3.89            |
| 16 | CrSF                                                           | BMS  | 1.79            | 0.42            | 1.35            | 1.76            | 3.14            |
| 17 | MnI <sub>3</sub>                                               | HSC  | 3.12            | 0.65            | 0.10            | 0.10            | 3.87            |
| 18 | CrSI                                                           | HSC  | 1.45            | 0.19            | 1.42            | 1.42            | 3.06            |
| 19 | Sr <sub>2</sub> MnClO <sub>3</sub>                             | HSC  | 2.68            | 0.91            | 0.59            | 0.59            | 4.18            |
| 20 | Sr <sub>2</sub> MnIO <sub>3</sub>                              | HMF  | -               | -               | -               | -               | 3.46            |
| 21 | Al <sub>2</sub> CoS <sub>4</sub>                               | BMS  | 0.31            | 0.88            | 1.90            | 2.21            | 2.78            |
| 22 | Al <sub>2</sub> CoS <sub>4</sub>                               | BMS  | 0.04            | 0.87            | 1.90            | 1.94            | 2.77            |
| 23 | CrTeCl                                                         | BMS  | 1.34            | 1.16            | 1.01            | 2.17            | 2.39            |
| 24 | CrAsS <sub>3</sub>                                             | BMS  | 0.03            | 0.12            | 1.51            | 1.54            | 1.63            |
| 25 | CrHS <sub>2</sub>                                              | HSC  | 0.25            | 0.09            | 2.82            | 2.82            | 3.17            |
| 26 | Ca <sub>2</sub> MnIO <sub>3</sub>                              | HSC  | 2.51            | 0.00            | 0.55            | 0.55            | 3.06            |
| 27 | CrPS <sub>3</sub>                                              | HSC  | 0.56            | 0.03            | 1.13            | 1.13            | 1.72            |
| 28 | CoCl <sub>2</sub>                                              | BMS  | 2.41            | 0.33            | 4.15            | 6.57            | 4.48            |
| 29 | VOF                                                            | HMF  | -               | -               | -               | -               | 6.32            |
| 30 | CrAuP <sub>2</sub> S <sub>6</sub>                              | HSC  | 1.12            | 0.00            | 1.51            | 1.51            | 2.63            |
| 31 | Sr <sub>2</sub> MnClO <sub>3</sub>                             | HSC  | 2.62            | 0.87            | 0.66            | 0.66            | 4.16            |
| 32 | MnTeI                                                          | HMF  | -               | -               | -               | -               | 1.91            |
| 33 | CrAgP <sub>2</sub> S <sub>6</sub>                              | HSC  | 1.10            | 0.06            | 1.94            | 1.94            | 3.10            |
| 34 | CrOF                                                           | HSC  | 1.13            | 1.50            | 3.86            | 3.86            | 6.48            |

## REFERENCES

- [1] Torelli, D., Thygesen, K. S., and Olsen, T., “High throughput computational screening for 2D ferromagnetic materials: the critical role of anisotropy and local correlations,” *2D Mater.* **6**(4), 045018 (2019).
- [2] Zheng, H., Han, H., Zheng, J., and Yan, Y., “Strain tuned magnetocrystalline anisotropy in ferromagnetic H-FeCl<sub>2</sub> monolayer,” *Solid State Commun.* **271**, 66 (2018).
- [3] Yang, X., Shen, Y., Lv, L., Zhou, M., Zhang, Y., Meng, X., Jiang, X., Ai, Q., Shuai, Y., and Zhou, Z., “Tuning the topological phase and anomalous hall conductivity with magnetization direction in H-FeCl<sub>2</sub> monolayer,” *Appl. Phys. Lett.* **123**(20), 203102 (2023).
- [4] Liu, L., Yang, K., Wang, G., and Wu, H., “Two-dimensional ferromagnetic semiconductor VBr<sub>3</sub> with tunable anisotropy,” *J. Mater. Chem. C* **8**(42), 14782 (2020).
- [5] Torelli, D., Moustafa, H., Jacobsen, K. W., and Olsen, T., “High-throughput computational screening for two-dimensional magnetic materials based on experimental databases of three-dimensional compounds,” *npj Comput. Mater.* **6**(1), 158 (2020).
- [6] Zhu, H.-R., Shao, B., and Zuo, X., “Enhancing ferromagnetic coupling in CrXY (X= O, S, Se; Y= Cl, Br, I) monolayers by turning the covalent character of Cr-X bonds,” *npj Comput. Mater.* **9**(1), 56 (2023).
- [7] Li, P., Yu, D., Liang, J., Ga, Y., and Yang, H., “Topological spin textures in 1T-phase janus magnets: Interplay between dzyaloshinskii-moriya interaction, magnetic frustration, and isotropic higher-order interactions,” *Phys. Rev. B* **107**(5), 054408 (2023).
- [8] He, W., Yin, Y., Gong, Q., Evans, R. F., Gutfleisch, O., Xu, B.-X., Yi, M., and Guo, W., “Giant magnetocaloric effect in magnets down to the monolayer limit,” *Small* **19**(36), 2300333 (2023).
- [9] Wang, C., Zhou, X., Zhou, L., Tong, N.-H., Lu, Z.-Y., and Ji, W., “A family of high-temperature ferromagnetic monolayers with locked spin-dichroism-mobility anisotropy: MnNX and CrCX (X= Cl, Br, I; C= S, Se, Te),” *Sci. Bull.* **64**(5), 293 (2019).

- [10] Guo, Y., Zhang, Y., Yuan, S., Wang, B., and Wang, J., “Chromium sulfide halide monolayers: intrinsic ferromagnetic semiconductors with large spin polarization and high carrier mobility,” *Nanoscale* **10**(37), 18036 (2018).
- [11] Kan, M., Zhou, J., Sun, Q., Kawazoe, Y., and Jena, P., “The intrinsic ferromagnetism in a  $\text{MnO}_2$  monolayer,” *J. Phys. Chem. Lett.* **4**(20), 3382 (2013).
- [12] Li, Y., Fu, H., Qi, Q., Li, Z., Ma, Y., Wu, X., and Zhong, C., “Interatomic doping regulating the electronic structure and magnetic anisotropy of  $\text{MnI}_3$  monolayer: A first-principles study,” *J. Appl. Phys.* **137**(21), 214302 (2025).
- [13] Kulish, V. V. and Huang, W., “Single-layer metal halides  $\text{MX}_2$  (X= Cl, Br, I): stability and tunable magnetism from first principles and monte carlo simulations,” *J. Mater. Chem. C* **5**(34), 8734 (2017).
- [14] Xiao, T., Wang, G., and Liao, Y., “Theoretical prediction of two-dimensional crof sheet as a ferromagnetic semiconductor or a half-metal,” *Chem. Phys.* **513**, 182 (2018).
